# Supplementary material for: Laser-treated wood for high-efficiency solar thermal steam generation
Source: Royal Society of Chemistry journal article supplement (doi:10.1039/d2ra02918a), 2022-01-01
Supplement: d2ra02918a2.pdf [file d2ra02918a2.pdf]

## Laser Treated Wood for High Efficiency Solar Thermal Steam Generation

Shu-Wei Wang<sup>1</sup>, Han-Lin Xie<sup>2</sup>, You-Yi Xia<sup>2\*</sup>, He-Xin Zhang<sup>2\*</sup>, Keun-Byoung Yoon<sup>3\*</sup>

<sup>1</sup>School of Textile and Material Engineering, Dalian Polytechnic University, Dalian, China.

<sup>2</sup>School of Chemistry & Chemical Engineering, Anhui University of Technology, China

<sup>3</sup>Department of Polymer Science and Engineering, Kyungpook National University, South Korea

Table S1. A comparison of the wood based solar-thermal steam generation system from the literatures.

| Wood                    | Method                                           | Solar intensity (kW/m <sup>2</sup> ) | Mass change (kg/m <sup>2</sup> ·h) | Efficiency (%) | Ref. |
|-------------------------|--------------------------------------------------|--------------------------------------|------------------------------------|----------------|------|
| Balsa wood              | Assemble of carbon dots within wood microchannel | 1                                    | 2.27                               | 92.5           | 1    |
| Basswood                | Nanoparticles deposited on wood surface          | 10                                   | 11.8                               | 85             | 2    |
| Basswood                | Carbonized wood with drilled channel-array       | 1                                    | 1.04                               | 75.1           | 3    |
| Nature wood             | Drop casting of GO on the wood surface           | 1                                    | 1.64                               | 91.8           | 4    |
| Poplar/Pine/Cocobolo    | Carbonized wood                                  | 1                                    | < 1                                | < 90           | 5    |
| Balsa wood              | CNT-modified flexible wood membrane              | 10                                   | 11.22                              | 81             | 6    |
| Wood                    | Flame treated wood                               | 1                                    | -                                  | 72             | 7    |
| Cunninghamia lanceolata | Carbonized wood                                  | 1                                    | 1.45                               | 91.3           | 8    |
| Basswood                | Spray-coated with graphite                       | 1                                    | 1.2                                | 80             | 9    |
| Natural Wood            | Carbonized wood                                  | 1/10                                 | 1.08/12.26                         | 74/89          | 10   |
| Natural Wood            | Alkali treatment                                 | 1                                    | 1.26                               | 80.1           | 11   |

|                                |                            |   |      |      |           |
|--------------------------------|----------------------------|---|------|------|-----------|
| Paulownia wood                 | Laser treated wood surface | 1 | 2.28 | 93.1 | This work |
| Pines                          | Laser treated wood surface | 1 | 1.97 | 80.3 |           |
| Toona sinensis (A. Juss.) Roem | Laser treated wood surface | 1 | 2.01 | 82.0 |           |
| Ziziphus jujuba Mill           | Laser treated wood surface | 1 | 1.67 | 68.1 |           |

- 1 Hou Q, Xue C R, Li N, *et al.* Self-assembly carbon dots for powerful solar water evaporation. *Carbon*, 2019, 149: 556-563
- 2 Zhu M, Li Y, Chen F, *et al.* Plasmonic Wood for High-Efficiency Solar Steam Generation. *Advanced Energy Materials*, 2018, 8: 1701028
- 3 Kuang Y, Chen C, He S, *et al.* A High-Performance Self-Regenerating Solar Evaporator for Continuous Water Desalination. *Adv Mater*, 2019, 31: 1900498
- 4 Kim K, Yu S, An C, *et al.* Mesoporous Three-Dimensional Graphene Networks for Highly Efficient Solar Desalination under 1 sun Illumination. *ACS Appl Mater Inter*, 2018, 10: 15602-15608
- 5 Jia C, Li Y, Yang Z, *et al.* Rich Mesostructures Derived from Natural Woods for Solar Steam Generation. *Joule*, 2017, 1: 588-599
- 6 Chen C J, Li Y J, Song J W, *et al.* Highly Flexible and Efficient Solar Steam Generation Device. *Adv Mater*, 2017, 29: 1701756
- 7 Xue G, Liu K, Chen Q, *et al.* Robust and Low-Cost Flame-Treated Wood for High-Performance Solar Steam Generation. *ACS Appl Mater Inter*, 2017, 9: 15052-15057
- 8 Peng-Fei L, Lei M, Ziyang D, *et al.* A mimetic transpiration system for record high conversion efficiency in solar steam generator under one-sun. *Materials Today Energy*, 2018, 8: 166-173
- 9 Li T, Liu H, Zhao X, *et al.* Scalable and Highly Efficient Mesoporous Wood-Based Solar Steam Generation Device: Localized Heat, Rapid Water Transport. *Adv Funct Mater*, 2018, 28: 1707134
- 10 Liu H, Chen C, Chen G, *et al.* High-Performance Solar Steam Device with Layered Channels: Artificial Tree with a Reversed Design. *Advanced Energy Materials*, 2018, 8: 1701616
- 11 Qiu P, Liu F, Xu C, *et al.* Porous three-dimensional carbon foams with interconnected microchannels for high-efficiency solar-to-vapor conversion and desalination. *J Mater Chem A*, 2019, 7: 13036-13042
